# Supplementary material for: Anthropometric, biochemical and hormonal profiles of the partially admixed pygmoid group in Rampasasa (Flores, Indonesia)
Source: publisher site journal article supplement (doi:10.1515/jpem-2020-0526), 2021-04-13
Supplement: Supplementary file 1 [file j_jpem-2020-0526_suppl.docx]

SUPPLEMENTARY FIGURES


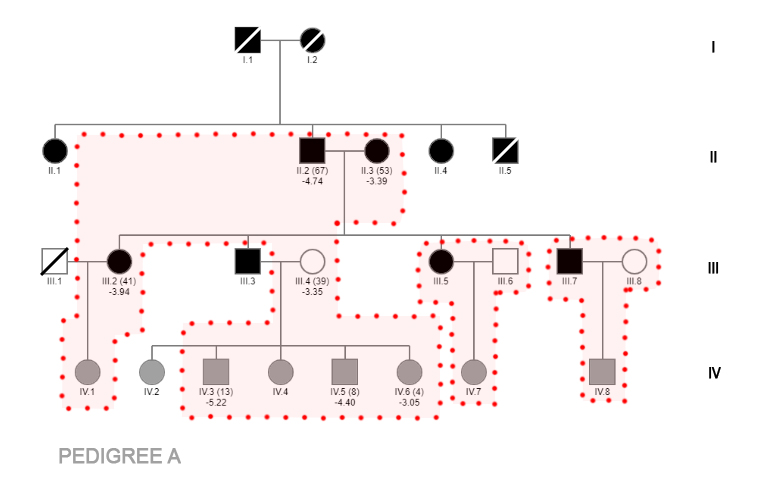


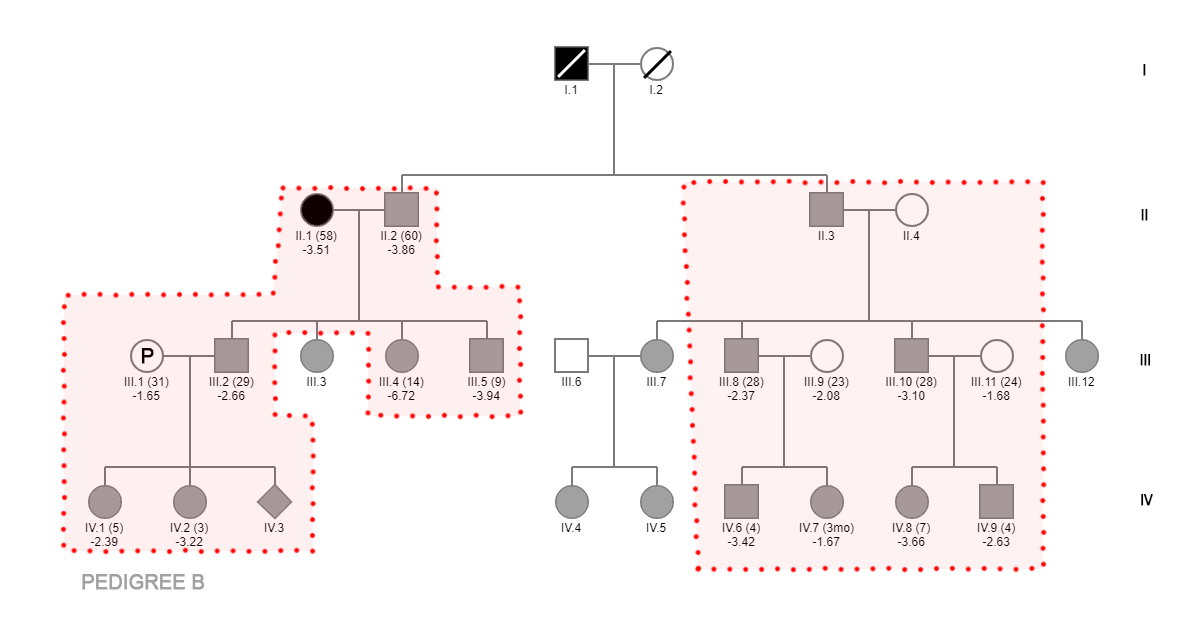


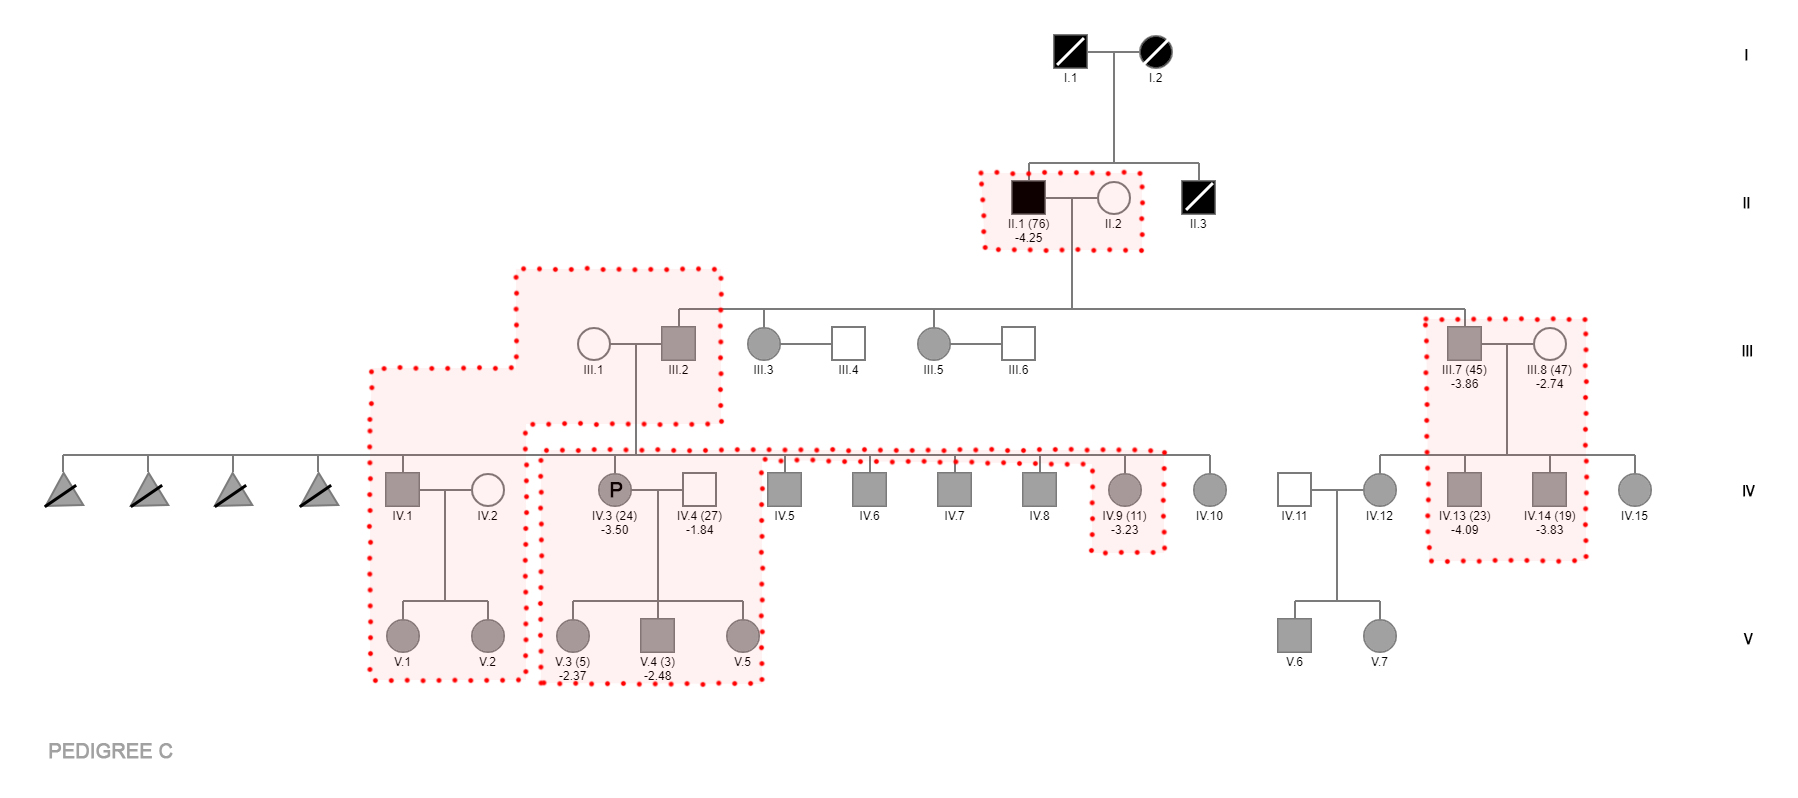


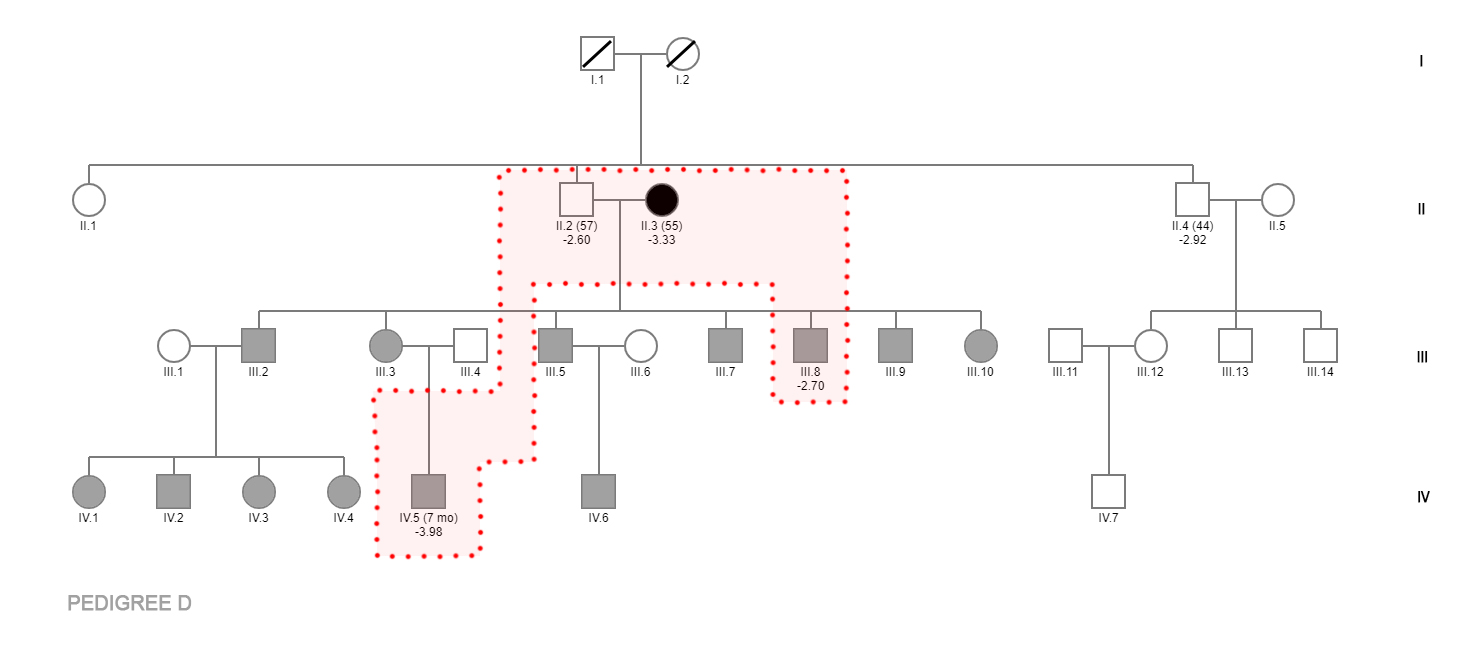


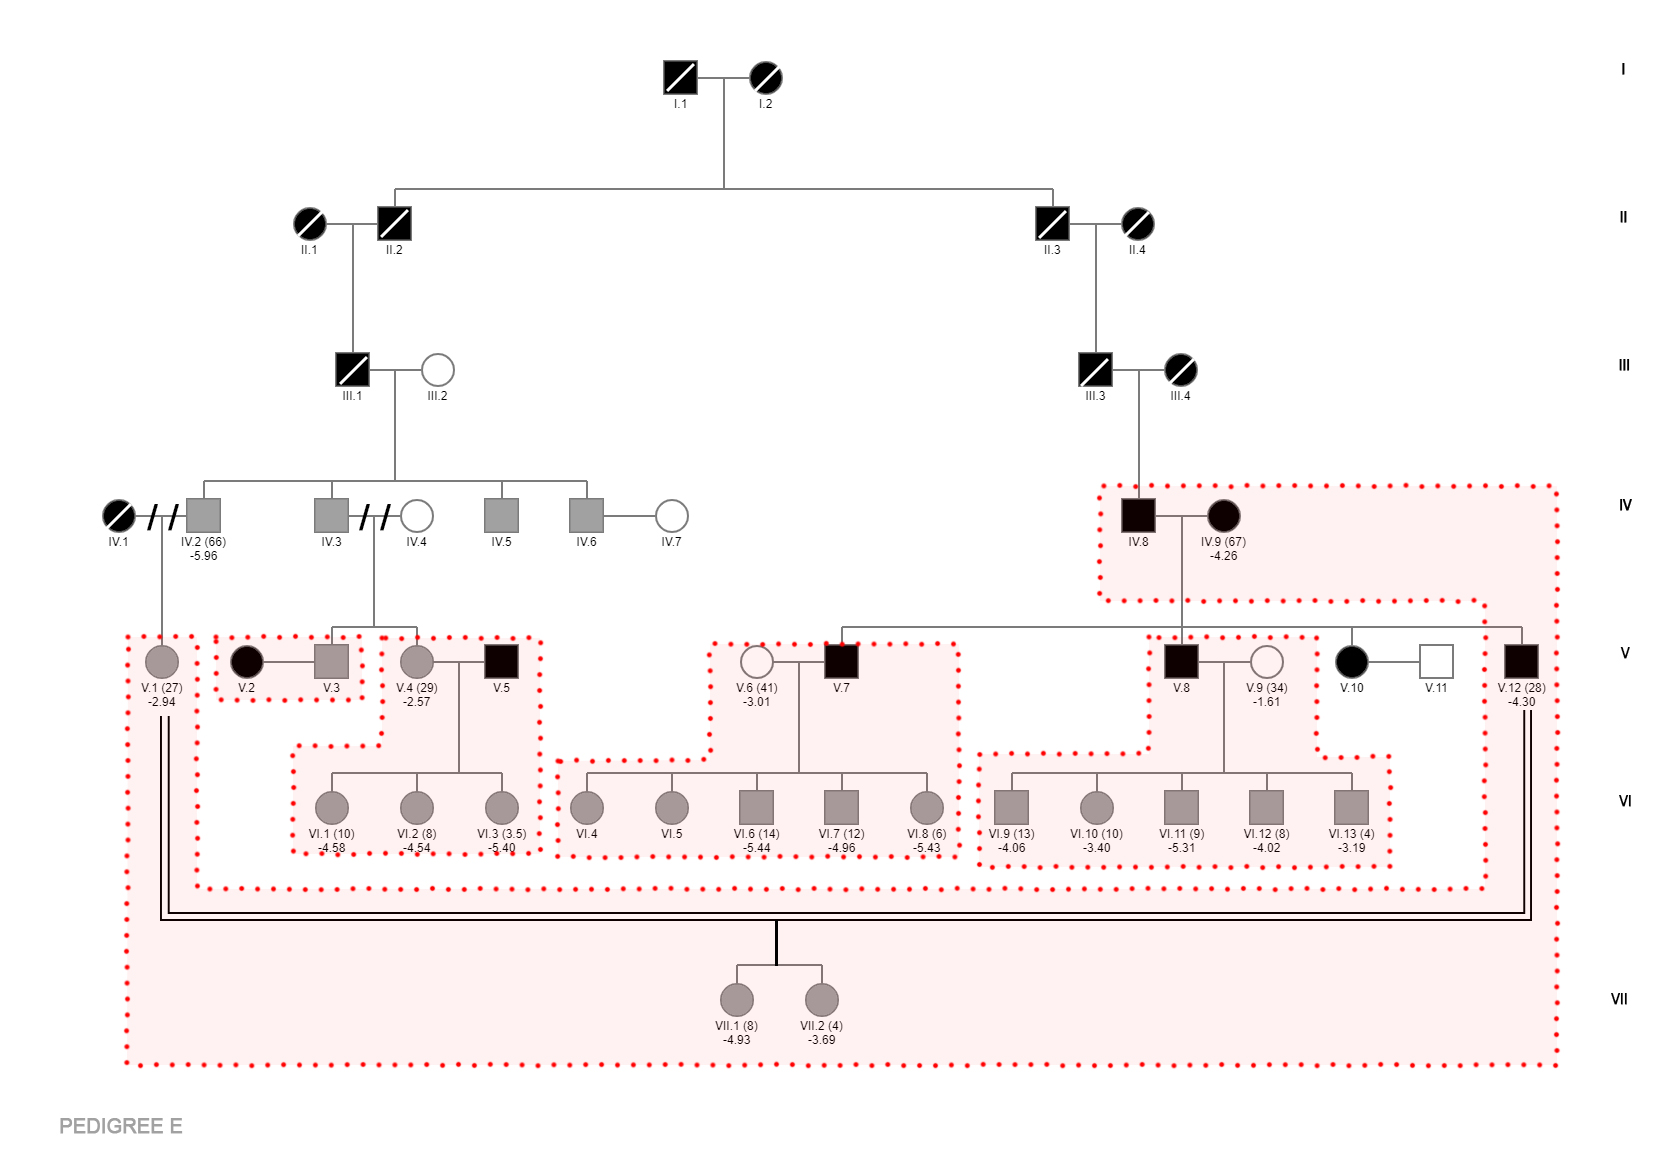


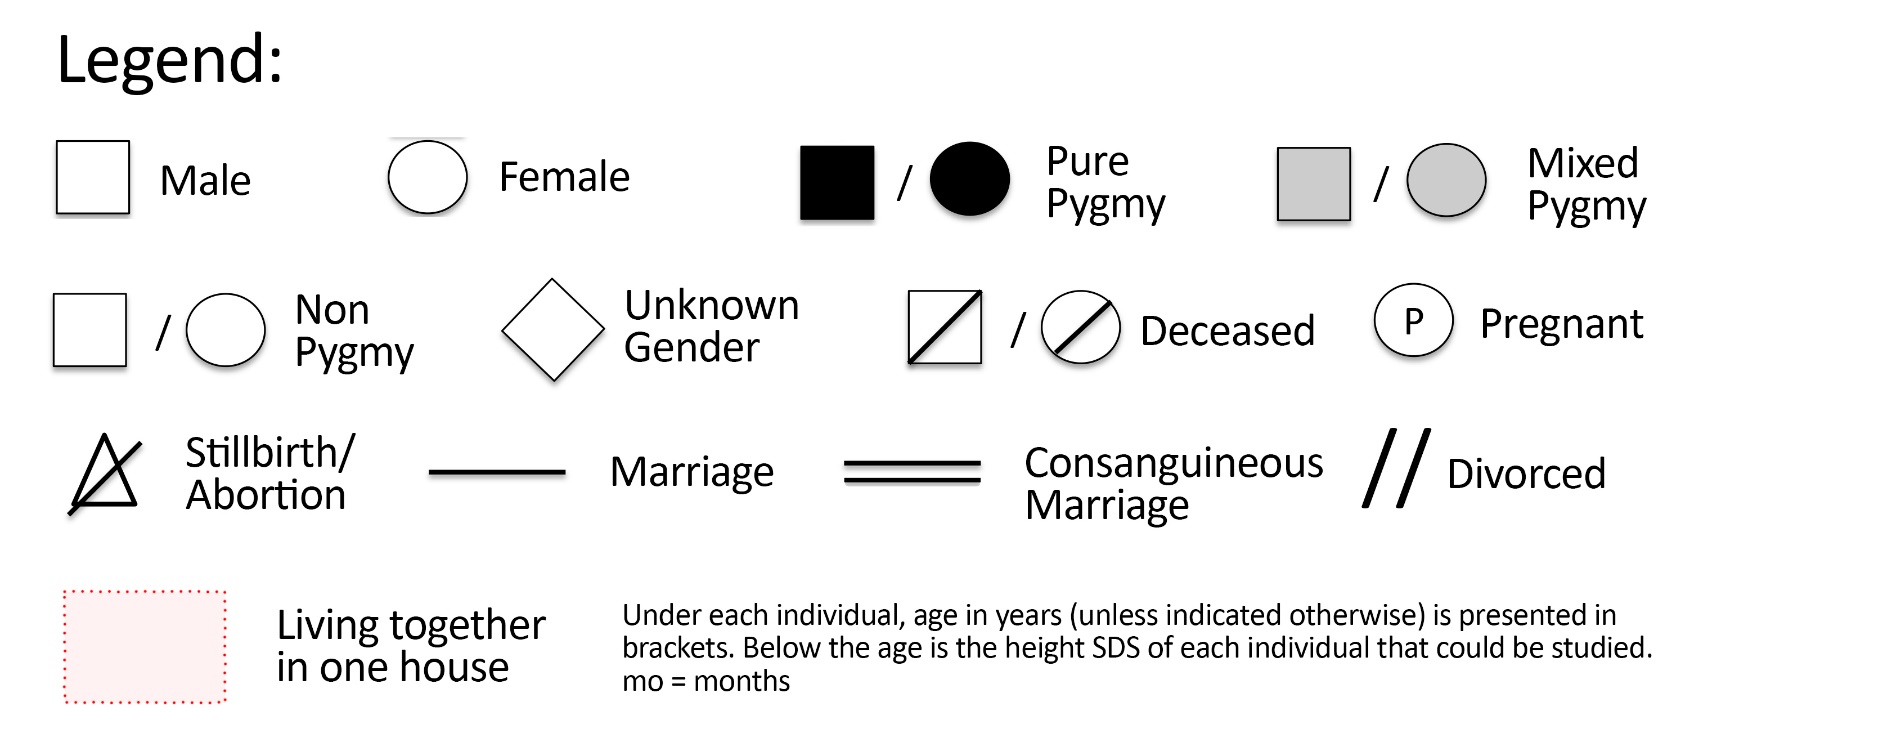


SUPPLEMENTARY TABLES

**Supplementary Table 1. Laboratory results of case B-III-04 at 20.7 years of age**

|  | **Result** | **Reference Range** |  |
| --- | --- | --- | --- |
| Fasting glucose | 91 | <100 | mg/dL |
| Fasting insulin | 20.4 | 3.2-28.5 | uIU/mL |
| Creatinine | 0.5 | 0.5-0.9 | mg/dL |
| eGFR | 140 | >60 | mL/min/1.73 m2 |
| FT4 | 1.44 | 0.93-1.71 | ng/dL |
| TSHs | 4.87 | 0.27-4.2 | uIU/mL |
| T3 (total) | 1.5 | 0.58-1.59 | ng/mL |
| T4 (total) | 10.76 | 4.87-11.72 | ug/dL |
| LH | 3.6 | Follicular phase: 1.80 – 11.78  Mid-cycle peak: 7.59 – 89.08  Luteal phase: 0.58 – 14.00 | mIU/mL |
| FSH | 5.28 | Follicular phase: 3.03 – 8.08  Mid-cycle peak: 2.55 – 16.69  Luteal phase: 1.38 – 5.47 | mIU/mL |
| Prolactin | 19.24 | 5.18-26.53 | ng/mL |
| Estradiol | 48 | Follicular phase: 21 – 251  Mid-cycle peak: 38 – 649  Luteal phase:  21 – 312 | pg/mL |
| Cortisol serum (morning) | 17.1 | 4.3-22.4 | ug/dL |
| IGF-I (SDS) | 249 (-0.09) | 105-346 | ng/mL |
| IGFBP-3 (SDS) | 4.8 (0.31) | 2.9-7.2 | mg/L |
| Growth hormone | 6.82 | <8 | ng/mL |
| ACTH (plasma) | 105 | 6-50 | pg/mL |

**Supplementary Table 2. Bone age, IGF-I, IGFBP-3 and IGF-I/IGFBP-3 ratio in children in Rampasasa (all P/N). IGF-I and IGFBP-3 data are presented in mass units, SDS for age and bone age, and for age (if age<9) or Tanner stage (if age≥9 years). IGF-I/IGFBP-3 is expressed as SDS for age and bone age.**

| **Subjects' code** | **Age** | **Sex (Tanner Stage)1** | **Bone Age (y)** | **Bone Age Delay (y)2** | **IGF-1 (ng/ml)** | **IGF-1 SDS for CA** | **IGF-1 SDS for BA** | **IGF-1 SDS (CA, pub)3** | **IGFBP-3 (ug/ml)** | **IGFBP-3 SDS for CA** | **IGFBP-3 SDS for BA** | **IGFBP-3 SDS (CA, pub)3** | **IGF-1/IGFBP-3 Ratio** | **IGF-1/IGFBP-3 Ratio SDS for CA** | **IGF-1/IGFBP-3 Ratio SDS for BA** |
| --- | --- | --- | --- | --- | --- | --- | --- | --- | --- | --- | --- | --- | --- | --- | --- |
| 22 | 0.26 | F | n.a | n.a | <20 | <-2.26 | n.a | <-2.26 | 1.81 | 0.44 | n.a | 0.44 | <11.05 | <-2.89 | n.a |
| 38 | 0.57 | M | n.a | n.a | <20 | <-3.25 | n.a | <-3.25 | 2.13 | 0.21 | n.a | 0.21 | <9.39 | <-4.89 | n.a |
|  |  |  |  |  |  |  |  |  |  |  |  |  |  |  |  |
| 20 | 2.94 | F | 3 | 0.06 | <20 | <-3.79 | <-3.78 | <-3.79 | 1.35 | -0.75 | -0.93 | -0.75 | <14.81 | <-4.13 | <-4.13 |
| 35 | 3.29 | M | 3.5 | -0.21 | <20 | <-3.70 | <-3.68 | <-3.70 | 1.57 | -0.61 | -0.61 | -0.61 | <12.74 | <-4.14 | <-4.32 |
| 47 | 3.57 | F | 3 | 0.57 | <20 | <-3.72 | <-3.78 | <-3.72 | 1.07 | -1.58 | -1.58 | -1.58 | <18.69 | <-3.45 | <-3.45 |
| 60 | 4.09 | F | 3.5 | 0.6 | 45 | -2.29 | -2.31 | -2.29 | 2.62 | 0.42 | 0.69 | 0.42 | 17.18 | -3.39 | -3.62 |
| 8 | 4.3 | F | 3.5 | 0.8 | 41 | -2.21 | -2.47 | -2.45 | 2.29 | 0.09 | 0.32 | 0.09 | 17.90 | -3.30 | -3.54 |
| 24 | 4.34 | M | 4 | 0.34 | <20 | <-3.59 | <-3.63 | <-3.59 | 1.25 | -1.50 | -1.40 | -1.50 | <16.00 | <-3.55 | <-3.55 |
| 57 | 4.34 | M | 4 | 0.34 | <20 | <-3.59 | <-3.63 | <-3.59 | 1.3 | -1.40 | -1.50 | -1.40 | <15.38 | <-3.63 | <-3.63 |
| 21 | 4.39 | M | 4.5 | -0.11 | <20 | <-3.58 | <-3.57 | <-3.58 | 1.78 | -0.60 | -0.60 | -0.60 | <11.24 | <-4.17 | <-4.17 |
| 34 | 5.37 | F | 4.17 | 1.21 | 69 | -1.53 | -1.52 | -1.53 | 6.7 | 2.94 | 3.19 | 2.94 | 10.30 | -4.16 | -4.29 |
| 19 | 5.71 | F | 4.17 | 1.54* | 47 | -2.19 | -2.21 | -2.19 | 3.07 | 0.56 | 0.87 | 0.56 | 15.31 | -3.45 | -3.64 |
| 52 | 5.93 | F | 4.17 | 1.77* | 45 | -2.26 | -2.29 | -2.26 | 2.37 | -0.04 | 0.17 | -0.04 | 18.99 | -2.66 | -3.15 |
| 23 | 7.34 | F | 6.83 | 0.52 | 29 | -2.91 | -2.92 | -2.91 | 1.48 | -2.31 | -1.53 | -2.31 | 19.59 | -2.41 | -2.49 |
| 46 | 7.98 | F | 5.75 | 2.23* | 91 | -1.14 | -1.03 | -1.14 | 3.06 | -0.27 | 0.55 | -0.27 | 29.74 | -1.38 | -1.59 |
| 59 | 8.04 | F | 5.75 | 2.29* | 60 | -1.85 | -1.78 | -1.85 | 2.59 | -1.01 | 0.16 | -1.01 | 23.17 | -2.08 | -2.24 |
| 56 | 8.08 | M | 5 | 3.09* | 57 | -1.79 | -1.58 | -1.79 | 1.95 | -1.36 | -0.56 | -1.36 | 29.23 | -1.33 | -1.64 |
| 7 | 8.72 | M | 6 | 2.72* | 42 | -2.30 | -2.17 | -2.30 | 1.79 | -1.59 | -1.02 | -1.59 | 23.46 | -1.96 | -2.08 |
| 61 | 9.21 | M (I) | 5 | 4.22* | 31 | -2.66 | -2.73 | -2.76 | 1.97 | -1.66 | -0.54 | -1.48 | 15.74 | -3.17 | -3.39 |
| 14 | 9.68 | M (I) | 7 | 2.68* | 72 | -1.72 | -1.24 | -1.80 | 3 | -0.50 | 0.25 | -0.55 | 24.00 | -1.92 | -2.03 |
| 45 | 10.77 | F (I) | 6.83 | 3.95* | 62 | -2.59 | -1.74 | -1.76 | 2.51 | -1.74 | -0.21 | -0.91 | 24.70 | -2.28 | -1.95 |
| 55 | 10.88 | F (I) | 7.83 | 3.05* | 89 | -2.18 | -1.16 | -1.27 | 2.94 | -1.20 | -0.40 | -0.55 | 30.27 | -1.72 | -1.17 |
| 31 | 11.27 | F (I) | 7.83 | 3.45* | 118 | -1.93 | -0.64 | -0.75 | 3.65 | -0.79 | 0.27 | 0.04 | 32.33 | -1.86 | -0.95 |
| 51 | 12.1 | M (II) | 8 | 4.1* | 49 | -2.55 | -2.01 | -2.45 | 2.67 | -1.83 | -0.48 | -1.54 | 18.35 | -3.62 | -2.51 |
| 54 | 12.98 | M (?) | 9 | 3.99* | 89 | -2.35 | -1.24 | -1.76 | 2.56 | -2.34 | -0.94 | -1.68 | 34.77 | -2.25 | -0.81 |
| 5 | 13.54 | M (?) | 10 | 3.54* | 46 | -2.80 | -2.30 | -2.50 | 1.86 | -3.04 | -2.18 | -2.55 | 24.73 | -3.33 | -1.98 |
| 50 | 14.23 | F (II) | 10 | 4.23* | 195 | -1.97 | -0.34 | -0.96 | 3.4 | -2.00 | -0.73 | -1.29 | 57.35 | -1.02 | 0.36 |
| 13 | 14.34 | F (I) | 10.75 | 3.6* | 105 | -3.19 | -1.87 | -0.98 | 3.03 | -2.37 | -1.09 | -1.73 | 34.65 | -2.57 | -1.28 |
|  |  |  |  |  |  |  |  |  |  |  |  |  |  |  |  |
| Mean | 7.98 |  | 5.89 | 0.63 | 69.10 | -2.57 | -2.22 | -2.33 | 2.46 | -0.92 | -0.38 | -0.74 | 21.82 | -2.88 | -2.59 |
| SD | 3.67 |  | 2.33 | 0.30 | 38.57 | 0.74 | 1.01 | 0.92 | 1.12 | 1.22 | 1.06 | 1.11 | 10.17 | 1.01 | 1.25 |

Abbreviations: BA, bone age; CA, chronological age; F, female; M, male; n.a., not available; P/N, offspring of one parent from the pygmoid group and a parent from the non-pygmoid group; y, year;

1 None of the included girls had had their menarche

2Delayed bone age as defined as >2 SD below the mean bone age for age is indicated by an asterisk

3IGF-I and IGFBP-3 SDS were calculated for age in children <9 years old and for Tanner stage in children ≥9 years

4For the calculation of mean (SD) IGF-I levels samples in which IGF-I was below the detection limit of 20 ng/mL, the value of was set at 20. Therefore the calculated means represent an overestimation of the real value

5Mean IGF-I SDS in children <9 years was -2.66 (0.86). Mean IGF-I in children ≥9 years adjusted for Tanner stage (assuming Tanner II in the boys with undocumented Tanner stage) was -1.70 (0.71).

6Mean IGFBP-3 SDS in children <9 years was -0.46 (1.19). Mean IGFBP-3 in children ≥9 years adjusted for Tanner stage (assuming Tanner II in the boys with undocumented Tanner stage) was -1.22(0.75).
